# Supplementary material for: Detection of Candida species in pregnant Chinese women with a molecular beacon method
Source: PubMed Central journal article supplement (PMC6096925; doi:10.1099/jmm.0.000740), 2018-04-20
Supplement: jmm-67-783-s001.pdf [file jmm-67-783-s001.pdf]

**Table S1.** Sequences of the primers and probes for the molecular beacon assays

| <b><i>Candida spp.</i></b> | <b>Forward primer</b>          | <b>Reverse primer</b>        | <b>Probe</b>                      |
|----------------------------|--------------------------------|------------------------------|-----------------------------------|
| <i>C. albicans</i>         | GGCGCTCAAGCCT<br>GCTACT        | ACGCCTGCCTACT<br>CGTGAA      | ATACTTCACCGTGATTG<br>CTGTTTTGACGC |
| <i>C. glabrata</i>         | CGAGAACAACCTCC<br>GATTCTATAACC | TGGACTCAGAATC<br>AGCATTTTCA  | CCAATGCGACCAACGAA<br>AAACACATG    |
| <i>C. parapsilosis</i>     | CATTTGCTCAATT<br>GTATGCTGATTT  | CGCAGCATCACGT<br>TTCCA       | CCCCAATCAATTTTGTTT<br>TCCCACACTTG |
| <i>C. tropicalis</i>       | ATAACAGGTCTGT<br>GATGCCCTTAGA  | CGCTGGCTCCGTC<br>AGTGTA      | TTCTGGGCCGACGCGC                  |
| <i>C. krusei</i>           | CGGCCGGGTCTTT<br>CCTT          | CCTGCTTTGAACA<br>CTCTAATTTCT | CCTCGGGCGAACCAGGA<br>CGATTAC      |

All the primer and probe sequences are displayed in the 5' to 3' direction.

**Table S2.** Specificity in the molecular beacon assays for *Candida* identification

| Species                           | Reference number |            | Ct values for real-time PCR |                    |                        |                      |                  |
|-----------------------------------|------------------|------------|-----------------------------|--------------------|------------------------|----------------------|------------------|
|                                   | CGMCCC           | ATCC       | <i>C. albicans</i>          | <i>C. glabrata</i> | <i>C. parapsilosis</i> | <i>C. tropicalis</i> | <i>C. krusei</i> |
| <i>C. albicans</i>                | 2.4159           |            | 19                          | ND                 | ND                     | ND                   | ND               |
| <i>C. glabrata</i>                | 2.3983           |            | ND                          | 18                 | ND                     | ND                   | ND               |
| <i>C. parapsilosis</i>            | 2.3989           |            | ND                          | ND                 | 18.5                   | ND                   | ND               |
| <i>C. tropicalis</i>              | 2.3967           |            | ND                          | ND                 | ND                     | 17                   | ND               |
| <i>C. krusei</i>                  | 2.1857           |            | ND                          | ND                 | ND                     | ND                   | 19               |
| <i>Streptococcus bovis</i>        | 1.1624           |            | ND                          | ND                 | ND                     | ND                   | ND               |
| <i>Streptococcus agalactiae</i>   |                  | 13813      | ND                          | ND                 | ND                     | ND                   | ND               |
| <i>Staphylococcus epidermidis</i> | 1.1757           |            | ND                          | ND                 | ND                     | ND                   | ND               |
| <i>Staphylococcus aureus</i>      | 1.2465           |            | ND                          | ND                 | ND                     | ND                   | ND               |
| <i>Aspergillus fumigatus</i>      | 3.6005           |            | ND                          | ND                 | ND                     | ND                   | ND               |
| <i>Aspergillus flavus</i>         | 3.6151           |            | ND                          | ND                 | ND                     | ND                   | ND               |
| <i>Aspergillus niger</i>          | 3.6478           |            | ND                          | ND                 | ND                     | ND                   | ND               |
| <i>Enterococcus faecalis</i>      | 1.2024           |            | ND                          | ND                 | ND                     | ND                   | ND               |
| <i>Pseudomonas aeruginosa</i>     | 1.2387           |            | ND                          | ND                 | ND                     | ND                   | ND               |
| <i>Neisseria gonorrhoeae</i>      |                  | 19424      | ND                          | ND                 | ND                     | ND                   | ND               |
| <i>Treponema pallidum</i>         |                  | BAA-2642SD | ND                          | ND                 | ND                     | ND                   | ND               |
| <i>Chlamydia trachomatis</i>      |                  | VR-571B    | ND                          | ND                 | ND                     | ND                   | ND               |
| <i>Ureaplasma urealyticum</i>     |                  | 27618      | ND                          | ND                 | ND                     | ND                   | ND               |
| <i>Escherichia coli</i>           | 1.1772           |            | ND                          | ND                 | ND                     | ND                   | ND               |
| <i>Pichia guilliermondii</i>      | 2.3943           |            | ND                          | ND                 | ND                     | ND                   | ND               |
| <i>Candida sake</i>               | 2.3955           |            | ND                          | ND                 | ND                     | ND                   | ND               |
| <i>Candida colliculosa</i>        | 2.2003           |            | ND                          | ND                 | ND                     | ND                   | ND               |
| <i>Candida intermedia</i>         | 2.2603           |            | ND                          | ND                 | ND                     | ND                   | ND               |
| <i>Candida kefyr</i>              | 2.2295           |            | ND                          | ND                 | ND                     | ND                   | ND               |

The specificity assays were carried out with the genomic DNA from the above standard microorganisms.

The PCR reaction setup was described in the Methods section.

Ct: threshold cycle in real-time PCR; ND: not detectable within the 40 repeating PCR cycles

CGMCCC: China General Microbiological Culture Collection Center
